# Supplementary material for: Quality Control of Radix Astragali (The Root of Astragalus membranaceus var. mongholicus) Along Its Value Chains
Source: PubMed Central journal article supplement (PMC7746871; doi:10.3389/fphar.2020.562376), 2020-12-04
Supplement: datasheet1.pdf [file datasheet1.pdf]

## Supplementary Material

### 1 Supplementary Figures

Compound 1: calycosin-7-glucoside

The reference substance chromatogram of calycosin-7-glucoside (single reference substance) and sample chromatogram of Radix Astragali are shown in **Figure 1**.

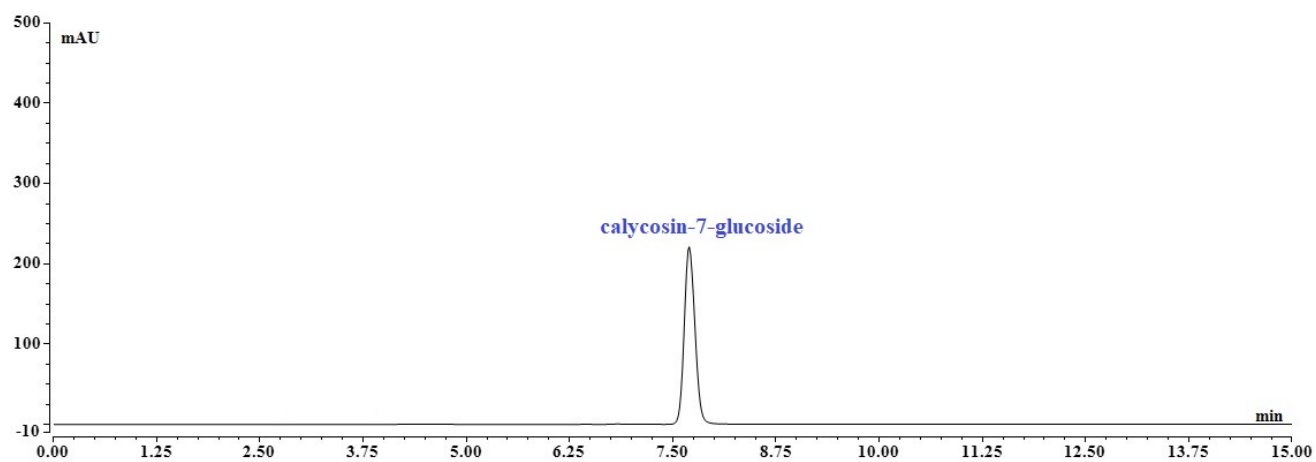

(A)

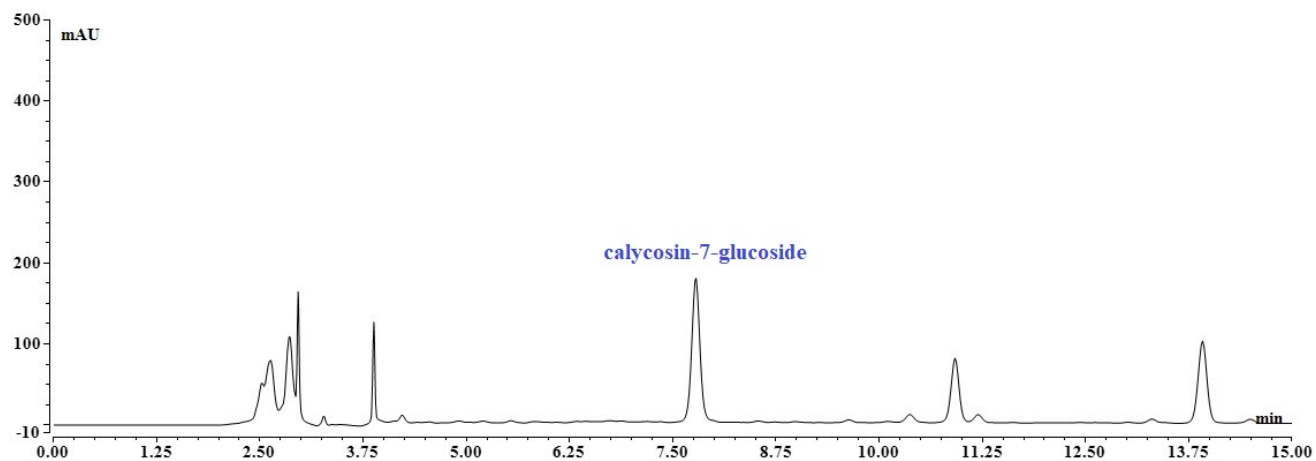

(B)

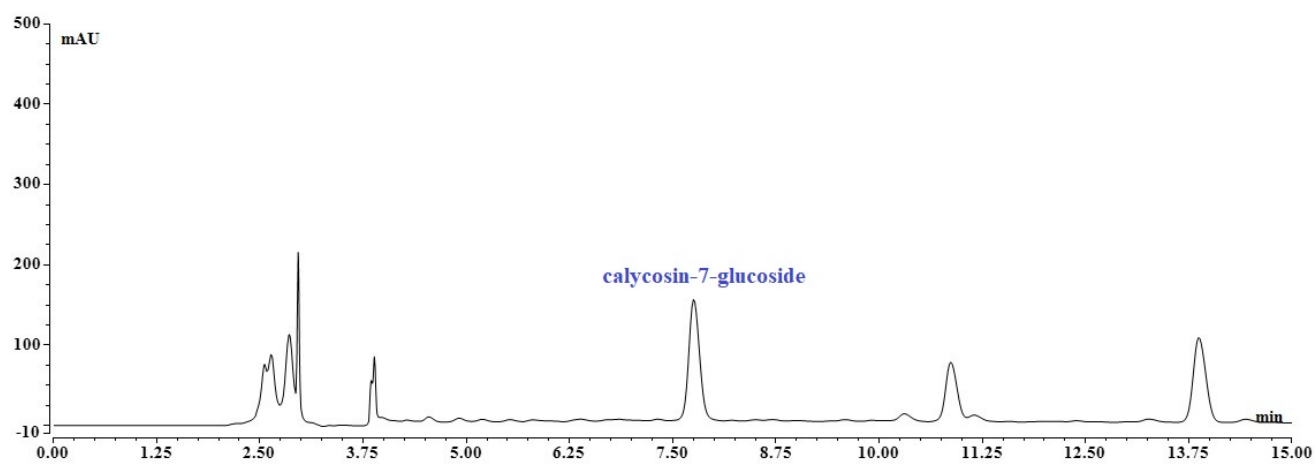

(C)

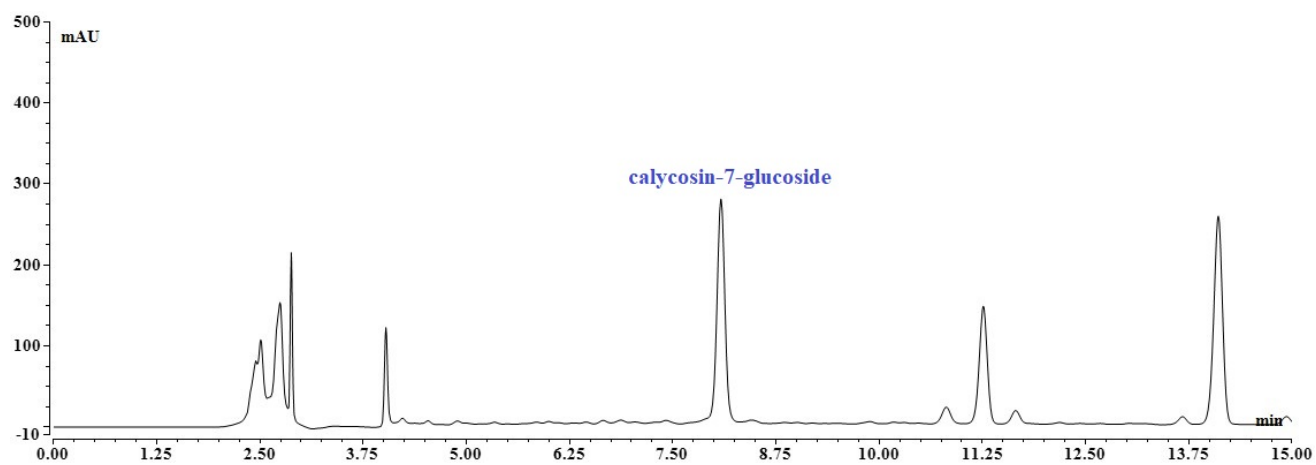

(D)

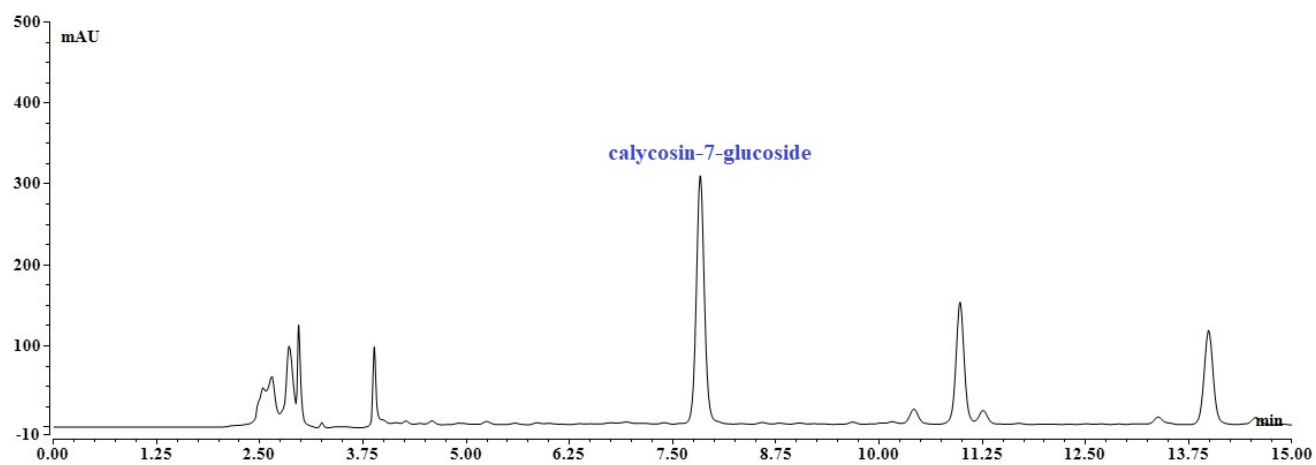

(E)

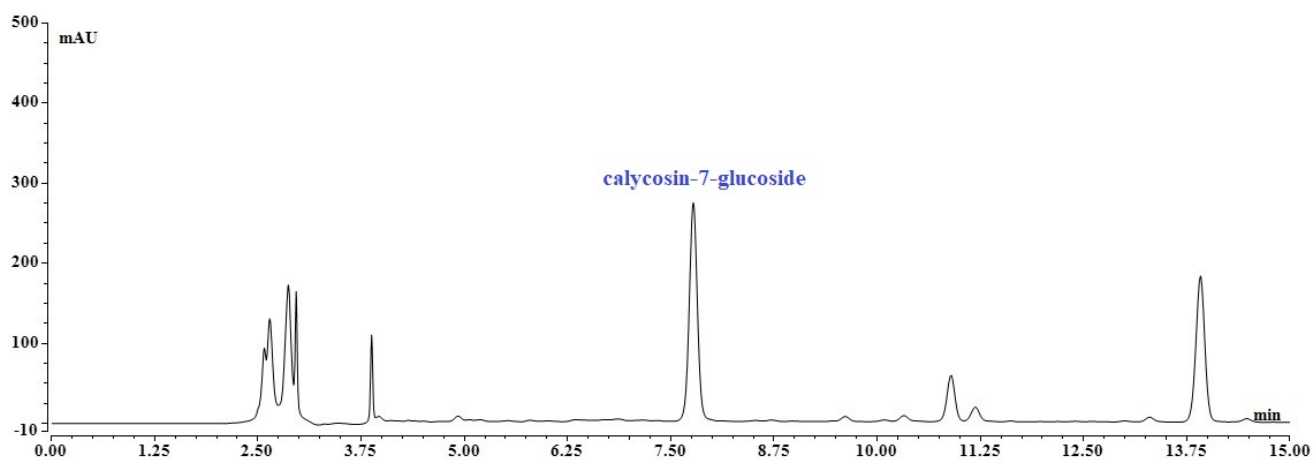

(F)

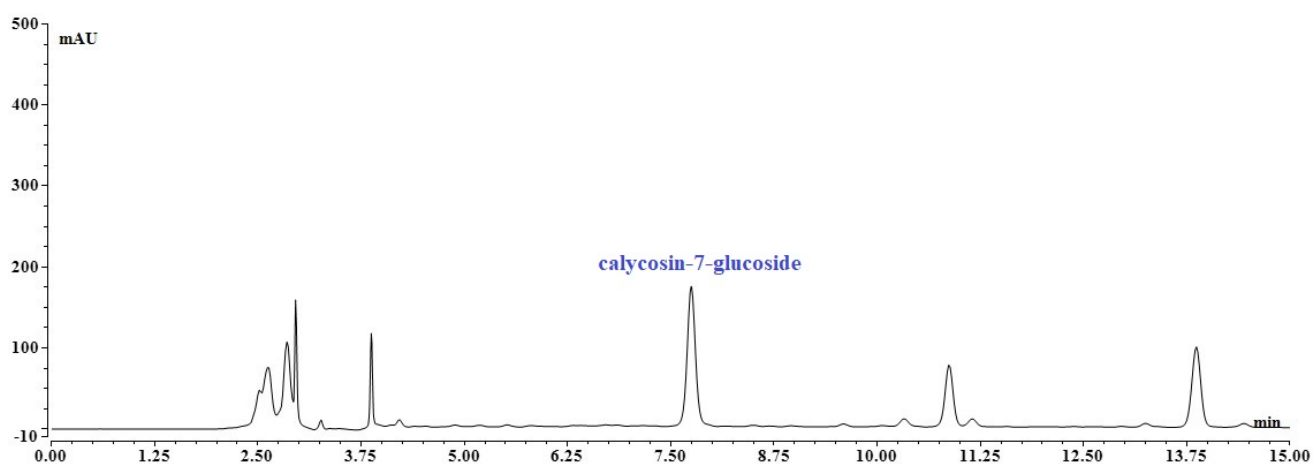

(G)

**Supplementary Figure 1** The representative HPLC chromatogram for calycosin-7-glucoside of Radix Astragali

(A) single reference substance; (B) 2019006IM; (C) 2019007IM; (D) 2019011IM; (E) 2019019IM; (F) 2019022IM; (G) 2019025IM.

**Compound 2:** astragaloside

The reference substance chromatogram of astragaloside (single reference substance) and sample chromatogram of Radix Astragali are shown in **Figure 2**.

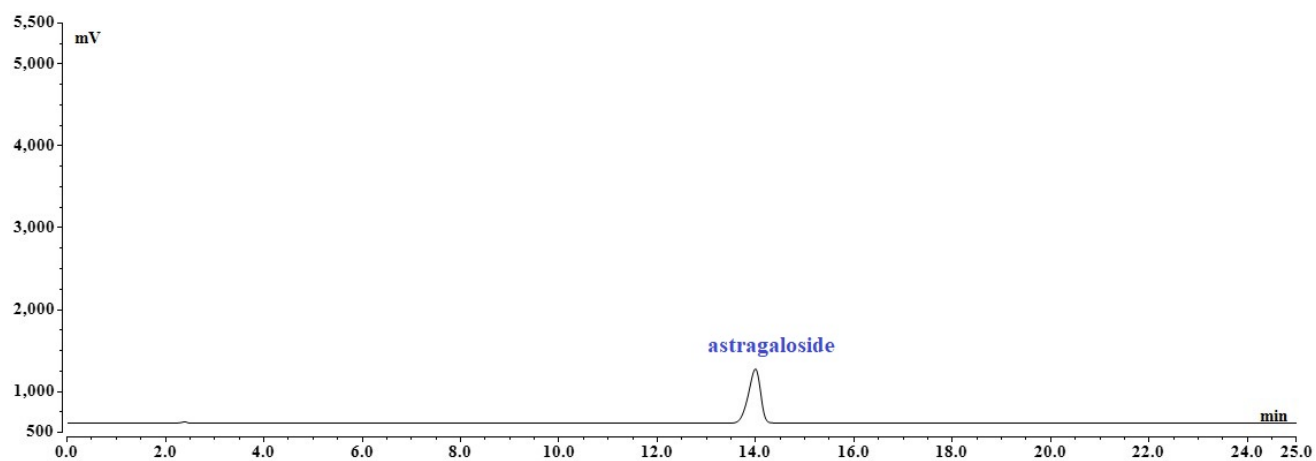

(A)

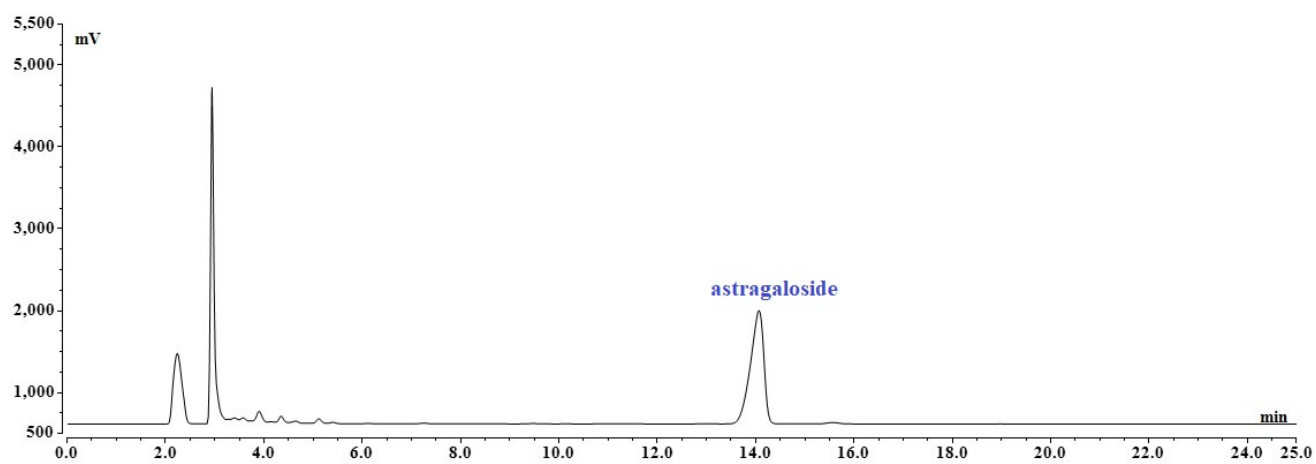

(B)

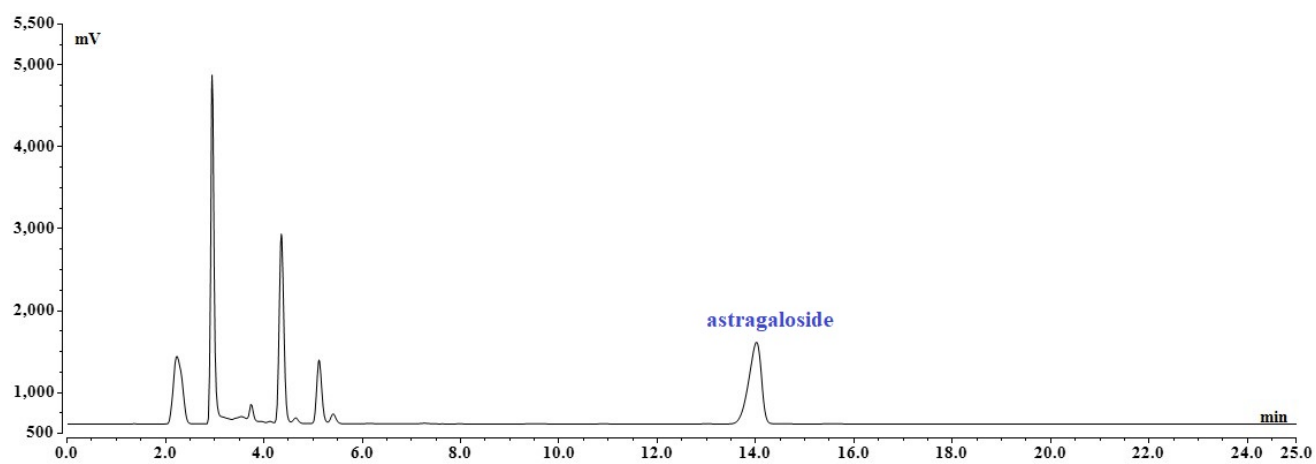

(C)

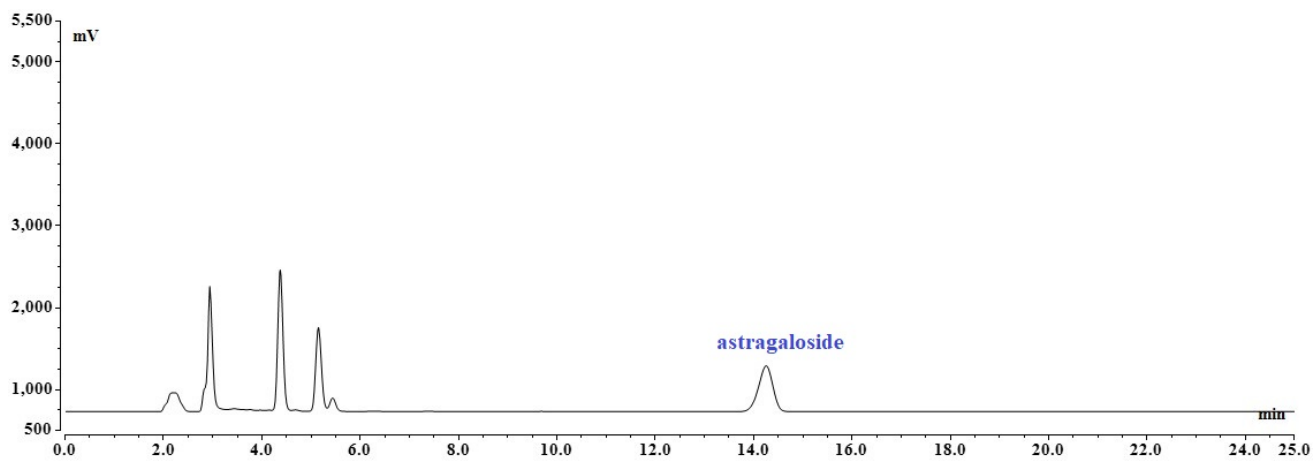

(D)

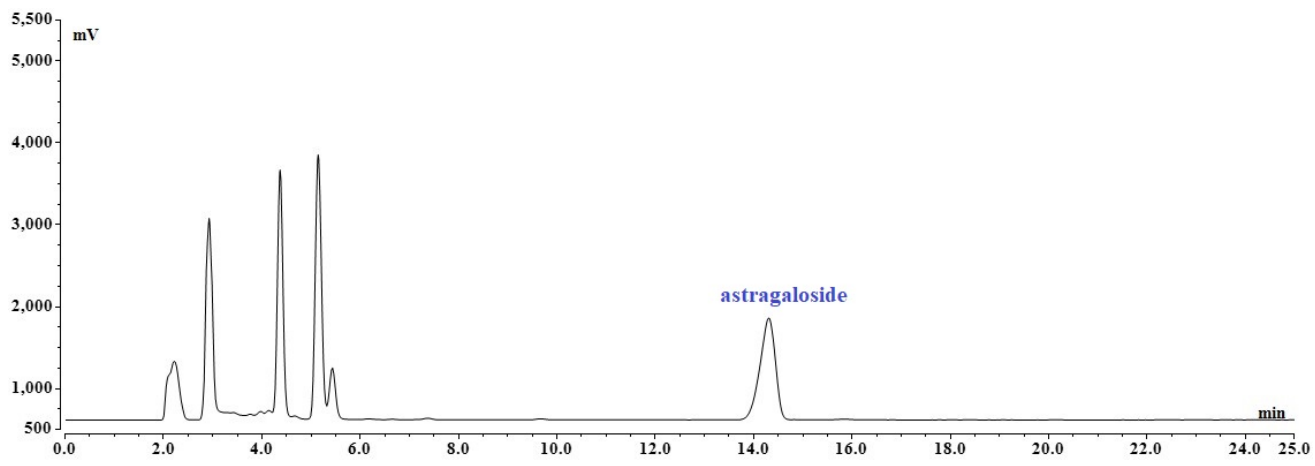

(E)

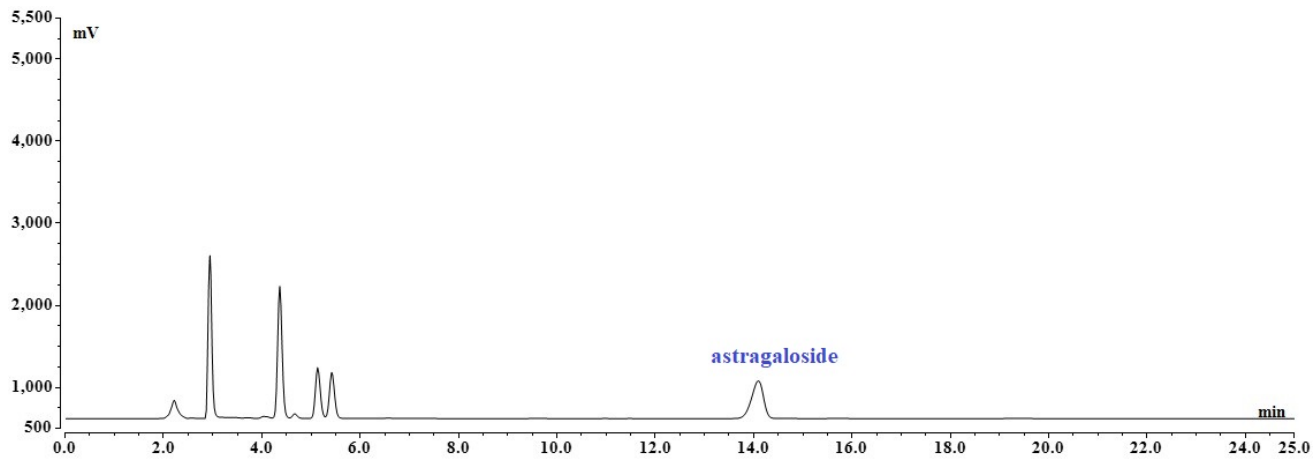

(F)

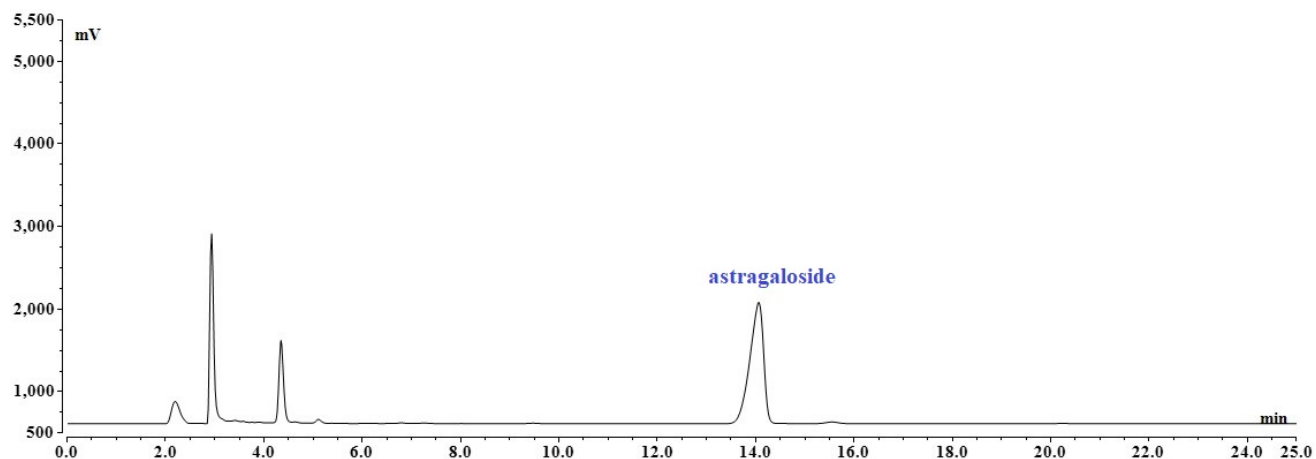

(G)

**Supplementary Figure 2** The representative HPLC chromatogram for calycosin-7-glucoside of Radix Astragali

(A) single reference substance; (B) 2019002GS; (C) 2019007IM; (D) 2019012IM; (E) 2019015IM; (F) 2019024IM; (G) 2019031SX.

## 2 Supplementary Table

**Supplementary Table 1** Taxonomic listings.

|   | <b>Plant common name</b> |  | <b>Plant full scientific name<br/>The Plant List</b>                     | <b>Plant full scientific name<br/>Flora of China</b>                       |
|---|--------------------------|--|--------------------------------------------------------------------------|----------------------------------------------------------------------------|
| 1 | Radix Astragali          |  | <i>Astragalus membranaceus</i> var. <i>mongholicus</i> (Bunge) P.K.Hsiao | <i>Astragalus membranaceus</i> var. <i>mongholicus</i> (Bunge) P. K. Hsiao |
